# Supplementary material
Source: PubMed Central journal article supplement (PMC2935145)
Supplement: NIHMS225943-supplement-1_si_001.pdf [file NIHMS225943-supplement-1_si_001.pdf]

## SUPPORTING INFORMATION

### Identification of a hemerythrin-like domain in a P<sub>1B</sub>-type transport ATPase<sup>†</sup>

Matthew E. Traverso,<sup>‡,§</sup> Poorna Subramanian,<sup>||</sup> Roman Davydov,<sup>§</sup> Brian M. Hoffman,<sup>‡,§</sup> Timothy  
L. Stemmler,<sup>||</sup> and Amy C. Rosenzweig<sup>‡,§,\*</sup>

From the <sup>‡</sup>Departments of Biochemistry, Molecular Biology, and Cell Biology and of  
<sup>§</sup>Chemistry, Northwestern University, Evanston IL 60208, <sup>||</sup>Department of Biochemistry and  
Molecular Biology, Wayne State University, School of Medicine, Detroit MI 48202

<sup>†</sup>This work was supported by NIH grants GM58518 (A. C. R.), DK068139 (T. L. S.), and  
HL13531 (B. M. H).

\*Address correspondence to: Amy C. Rosenzweig, Departments of Biochemistry, Molecular  
Biology, and Cell Biology and of Chemistry, Northwestern University, Evanston IL 60208, Tel:  
847-467-5301, Fax: 847-467-6489, E-mail: amyrc@northwestern.edu

Running title: A hemerythrin-like domain in a P<sub>1B</sub>-type ATPase

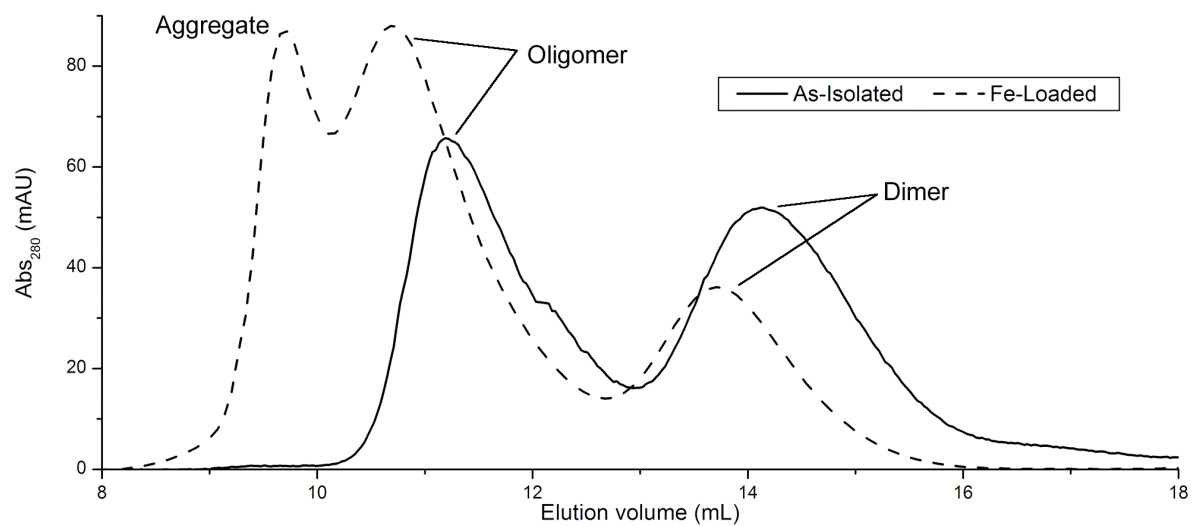

Figure S1: Analytical gel filtration analysis of P<sub>1B-5</sub>-Hr. A calibrated 22.5 mL Superdex-75 column was equilibrated with 50 mM Tris, pH 7.0, and 200 mM NaCl. The calculated masses of the as-isolated and iron-loaded dimers are 33.7 kDa and 39.9 kDa, respectively.

Figure S2: The GI numbers of the 195 identified P<sub>1B-5</sub>-ATPases listed by source organism, alphabetically. Italics are used to denote proteins that contain a C-terminal soluble metal binding domain.

| <u>Source:</u>                                   | <u>GI#</u> |
|--------------------------------------------------|------------|
| (uncultured bacterium)                           | 255292694  |
| Acidiphilium cryptum JF-5                        | 148262009  |
| Acidobacterium capsulatum ATCC51196              | 225874260  |
| <i>Acidothermus cellulolyticus</i> 11B           | 117927237  |
| Agrobacterium radiobacter K84                    | 222081286  |
| Arthrobacter chlorophenolicus A6                 | 220912832  |
| Arthrobacter sp. FB24                            | 116668908  |
| Aurantimonas manganoxydans SI85-9A1              | 92117484   |
| Azorhizobium caulinodans ORS571                  | 158423267  |
| bacterium Ellin514                               | 223940178  |
| Bacteroides vulgatus EK4.2                       | 294781379  |
| Beutenbergia cavernae DSM12333                   | 229818741  |
| Bifidobacterium adolescentis ATCC15703           | 119025076  |
| Bifidobacterium adolescentis L2-32               | 154486406  |
| Bifidobacterium angulatum DSM20098               | 229816919  |
| Bifidobacterium animalis subsp. lactis HN019     | 183602224  |
| Bifidobacterium bifidum NCIMB41171               | 224282233  |
| Bifidobacterium breve DSM20213                   | 291455776  |
| Bifidobacterium catenulatum DSM16992             | 212715204  |
| Bifidobacterium dentium ATCC27678                | 171741678  |
| Bifidobacterium gallicum DSM20093                | 261338486  |
| Bifidobacterium longum DJO10A                    | 23336194   |
| Bifidobacterium longum DJO10A                    | 189440214  |
| Bifidobacterium longum NCC2705                   | 23465139   |
| Bifidobacterium longum subsp. infantis ATCC15697 | 213691024  |
| Bifidobacterium longum subsp. infantis ATCC55813 | 227547406  |
| Bifidobacterium longum subsp. infantis CCUG52486 | 239622749  |
| Bifidobacterium longum subsp. longum F8          | 291517665  |
| Bifidobacterium pseudocatenulatum D2CA           | 295088290  |
| Bifidobacterium pseudocatenulatum DSM20438       | 225352432  |
| Blastopirellula marina DSM3645                   | 87311009   |
| <i>Bradyrhizobium</i> sp. <i>BTAi1</i>           | 148252886  |
| <i>Bradyrhizobium</i> sp. <i>BTAi1</i>           | 148254856  |
| <i>Bradyrhizobium</i> sp. <i>ORS278</i>          | 146343094  |
| Brevibacterium mcbrellneri ATCC49030             | 295395974  |
| <i>Burkholderia ambifaria</i> MC40-6             | 172065508  |
| <i>Burkholderia cenocepacia</i> J2315            | 206562184  |

|                                             |           |
|---------------------------------------------|-----------|
| <i>Burkholderia dolosa</i> AUO158           | 254255483 |
| <i>Burkholderia glumae</i> BGR1             | 238024475 |
| <i>Burkholderia multivorans</i> ATCC17616   | 254255483 |
| <i>Burkholderia phymatum</i> STM815         | 186471018 |
| <i>Burkholderia vietnamiensis</i> G4        | 134291679 |
| <i>Chromobacterium violaceum</i> ATCC12472  | 34498203  |
| <i>Corynebacterium amycolatum</i> SK46      | 213966070 |
| <i>Corynebacterium efficiens</i> YS-314     | 259507553 |
| <i>Corynebacterium efficiens</i> YS-314     | 25028496  |
| <i>Corynebacterium glutamicum</i> ATCC13032 | 19551725  |
| <i>Corynebacterium glutamicum</i> R         | 145294634 |
| <i>Corynebacterium urealyticum</i> DSM7109  | 172040330 |
| <i>Enterococcus faecalis</i> AR01/DG        | 257416810 |
| <i>Enterococcus faecalis</i> ATCC29200      | 229549253 |
| <i>Enterococcus faecalis</i> ATCC4200       | 256616865 |
| <i>Enterococcus faecalis</i> CH188          | 257090762 |
| <i>Enterococcus faecalis</i> DS5            | 256957860 |
| <i>Enterococcus faecalis</i> HH22           | 227554118 |
| <i>Enterococcus faecalis</i> HIP11704       | 256963740 |
| <i>Enterococcus faecalis</i> Merz96         | 256961141 |
| <i>Enterococcus faecalis</i> PC1.1          | 293378705 |
| <i>Enterococcus faecalis</i> T2             | 255975024 |
| <i>Enterococcus faecalis</i> T3             | 256763259 |
| <i>Enterococcus faecalis</i> T8             | 256853932 |
| <i>Enterococcus faecalis</i> TUSoD Ef11     | 238857216 |
| <i>Enterococcus faecalis</i> TX0104         | 227519692 |
| <i>Enterococcus faecalis</i> TX1322         | 229545009 |
| <i>Enterococcus faecalis</i> V583           | 29377108  |
| <i>Enterococcus faecalis</i> X98            | 257421795 |
| <i>Enterococcus faecium</i> 1               | 257885295 |
| <i>Enterococcus faecium</i> 1               | 257888610 |
| <i>Enterococcus faecium</i> Com15           | 257898953 |
| <i>Enterococcus faecium</i> DO              | 69245746  |
| <i>Enterococcus faecium</i> E1039           | 293556703 |
| <i>Enterococcus faecium</i> E1679           | 294619106 |
| <i>Enterococcus faecium</i> E980            | 293571018 |
| <i>Enterococcus faecium</i> TX1330          | 227550585 |
| <i>Enterococcus</i> sp.7L76                 | 295113598 |
| <i>Gardnerella vaginalis</i> 409-05         | 283782528 |
| <i>Gardnerella vaginalis</i> ATCC14019      | 227506609 |
| <i>Hoeflea phototrophica</i> DFL-43         | 163757665 |
| <i>Jonesia denitrificans</i> DSM20603       | 256832151 |
| <i>Lactobacillus acidophilus</i> NCFM       | 58338172  |
| <i>Lactobacillus amylolyticus</i> DSM11664  | 295425550 |
| <i>Lactobacillus antri</i> DSM16041         | 259501808 |
| <i>Lactobacillus brevis</i> ATCC367         | 116333058 |

|                                                          |           |
|----------------------------------------------------------|-----------|
| Lactobacillus brevis subsp. gravesensis ATCC27305        | 227508416 |
| Lactobacillus buchneri ATCC11577                         | 227511422 |
| Lactobacillus casei ATCC334                              | 116496221 |
| Lactobacillus casei BL23                                 | 191639747 |
| Lactobacillus crispatus125-2-CHN                         | 256843893 |
| Lactobacillus crispatus214-1                             | 293381163 |
| Lactobacillus crispatus JV-V01                           | 227878436 |
| Lactobacillus crispatus MV-1A-US                         | 256849544 |
| Lactobacillus crispatus MV-3A-US                         | 262046212 |
| Lactobacillus crispatus ST1                              | 295693834 |
| Lactobacillus delbrueckii subsp. bulgaricus ATCC11842    | 104774768 |
| Lactobacillus delbrueckii subsp. bulgaricus ATCC BAA-365 | 116514903 |
| Lactobacillus gasseri202-4                               | 238852800 |
| Lactobacillus gasseri224-1                               | 282850687 |
| Lactobacillus gasseri ATCC33323                          | 116630367 |
| Lactobacillus gasseri JV-V03                             | 227522005 |
| Lactobacillus gasseri MV-22                              | 226820386 |
| Lactobacillus helveticus DPC4571                         | 161508189 |
| Lactobacillus helveticus DSM20075                        | 260101923 |
| Lactobacillus hilgardii ATCC8290                         | 227523622 |
| Lactobacillus jensenii269-3                              | 238855459 |
| Lactobacillus jensenii27-2-CHN                           | 256851645 |
| Lactobacillus jensenii JV-V16                            | 297205253 |
| Lactobacillus jensenii SJ-7A-US                          | 260665179 |
| Lactobacillus johnsonii FI9785                           | 268320203 |
| Lactobacillus johnsonii NCC533                           | 42519841  |
| Lactobacillus paracasei subsp. paracasei8700:2           | 239630669 |
| Lactobacillus paracasei subsp. paracasei ATCC25302       | 227532788 |
| Lactobacillus plantarum JDM1                             | 254557835 |
| Lactobacillus plantarum WCFS1                            | 28379680  |
| Lactobacillus reuteri100-23                              | 194467568 |
| Lactobacillus reuteri CF48-3A                            | 227544769 |
| Lactobacillus reuteri DSM20016                           | 148543417 |
| Lactobacillus rhamnosus GG                               | 258509798 |
| Lactobacillus rhamnosus HN001                            | 199597656 |
| Lactobacillus rhamnosus HN001                            | 199599693 |
| Lactobacillus rhamnosus Lc705                            | 258540985 |
| Lactobacillus rhamnosus LMS2-1                           | 229551258 |
| Lactobacillus ruminis ATCC25644                          | 227527776 |
| Lactobacillus sakei subsp. sakei23K                      | 81428580  |
| Lactobacillus salivarius ATCC11741                       | 227892447 |
| Lactobacillus salivarius UCC118                          | 90961151  |
| Lactobacillus ultunensis DSM16047                        | 227893892 |
| Lactococcus lactis subsp. cremoris MG1363                | 125622979 |
| Lactococcus lactis subsp. cremoris SK11                  | 116510911 |
| Lactococcus lactis subsp. lactis II1403                  | 15672077  |

|                                                |           |
|------------------------------------------------|-----------|
| Lactococcus lactis subsp. lactis KF147         | 281490559 |
| Legionella longbeachae D-4968                  | 270158918 |
| Mesorhizobium loti MAFF303099                  | 13475503  |
| Mesorhizobium sp. BNC1                         | 110634596 |
| Methylacidiphilum inferorum V4                 | 189219327 |
| Methylobacterium chloromethanicum CM4          | 218529299 |
| Methylobacterium extorquens AM1                | 240137622 |
| Methylobacterium extorquens AM1                | 240140324 |
| Methylobacterium extorquens DM4                | 254558953 |
| Methylobacterium extorquens DM4                | 254560195 |
| <i>Methylobacterium nodulans</i> ORS2060       | 220919964 |
| <i>Methylobacterium nodulans</i> ORS2060       | 220925984 |
| Methylobacterium radiotolerans JCM2831         | 170746832 |
| Methylobacterium radiotolerans JCM2831         | 170748978 |
| Methylobacterium sp.4-46                       | 170741753 |
| <i>Methylocella silvestris</i> BL2             | 217979864 |
| Micrococcus luteus SK58                        | 289706347 |
| <i>Micromonospora aurantiaca</i> ATCC27029     | 270500961 |
| <i>Mycobacterium gilvum</i> PYR-GCK            | 145225569 |
| <i>Mycobacterium kansasii</i> ATCC12478        | 240171847 |
| <i>Mycobacterium marinum</i> M                 | 183983486 |
| <i>Mycobacterium</i> sp. MCS                   | 108798052 |
| <i>Mycobacterium vanbaalenii</i> PYR-1         | 120402396 |
| <i>Nakamurella multipartita</i> DSM44233       | 258654385 |
| Nitrobacter hamburgensis X14                   | 92117484  |
| Oceanibulbus indolifex HEL-45                  | 163744196 |
| Ochrobactrum anthropi ATCC49188                | 153011922 |
| Ochrobactrum anthropi ATCC49188                | 153012045 |
| Ochrobactrum intermedium LMG3301               | 239834632 |
| Parachlamydia acanthamoebae str. Hall's coccus | 282891768 |
| Pediococcus pentosaceus ATCC25745              | 116491908 |
| Pirellula staleyi DSM6068                      | 283781773 |
| Planctomyces limnophilus DSM3776               | 296121198 |
| Planctomyces maris DSM8797                     | 149175592 |
| <i>Pseudomonas putida</i> F1                   | 148547671 |
| <i>Ralstonia eutropha</i> H16                  | 113867966 |
| <i>Ralstonia eutropha</i> JMP134               | 73540929  |
| <i>Ralstonia pickettii</i> 12J                 | 187926549 |
| Rhizobium leguminosarum bv. viciae3841         | 116251636 |
| <i>Rhodococcus equi</i> ATCC33707              | 295817629 |
| <i>Rhodococcus erythropolis</i> PR4            | 226306903 |
| <i>Rhodomicrobium vannielii</i> ATCC17100      | 283824493 |
| Rhodopirellula baltica SH1                     | 32473383  |
| Roseobacter sp. GAI101                         | 254488107 |
| Roseovarius sp.217                             | 85704360  |
| Roseovarius sp. HTCC2601                       | 114762510 |

|                                                                         |           |
|-------------------------------------------------------------------------|-----------|
| Roseovarius sp. TM1035                                                  | 149201293 |
| <i>Saccharopolyspora erythraea</i> NRRL2338                             | 134098976 |
| <i>Saccharopolyspora erythraea</i> NRRL2338                             | 291006784 |
| <i>Salinispora arenicola</i> CNS-205                                    | 159037165 |
| <i>Salinispora tropica</i> CNB-440                                      | 145594127 |
| <i>Sanguibacter keddieii</i> DSM10542                                   | 269794134 |
| <i>Sinorhizobium meliloti</i>                                           | 270208673 |
| <i>Sinorhizobium meliloti</i> 1021                                      | 270208673 |
| <i>Streptococcus gallolyticus</i> UCN34                                 | 288906222 |
| <i>Streptococcus infantarius</i> subsp. <i>infantarius</i> ATCC BAA-102 | 171779135 |
| <i>Streptomyces albus</i> J1074                                         | 239983484 |
| <i>Streptomyces coelicolor</i> A3(2)                                    | 21218721  |
| <i>Streptomyces lividans</i> TK24                                       | 256790300 |
| <i>Streptomyces scabiei</i> 87.22                                       | 290955608 |
| <i>Streptomyces viridochromogenes</i> DSM40736                          | 256799641 |
| <i>Thiomicrospira crunogena</i> XCL-2                                   | 78485067  |
| <i>Verrucomicrobium spinosum</i> DSM4136                                | 171915328 |
| <i>Weissella paramesenteroides</i> ATCC33313                            | 241896616 |
| <i>Xanthobacter autotrophicus</i> Py2                                   | 154245955 |
| <i>Yersinia intermedia</i> ATCC29909                                    | 238791563 |
